# Supplementary material for: Hospital Memories and Six-Month Psychological Outcome: A Prospective Study in Critical Ill Patients with COVID-19 Respiratory Failure
Source: MDPI journal article supplement (doi:10.3390/jcm12093344), 2023-05-08
Supplement: s1 [file s1]

# **Hospital memories and six-months psychological outcome: a prospective study in critical care COVID-19 patients.**

Matteo Pozzi <sup>1</sup>, Claudio Ripa <sup>2</sup>, Valeria Meroni <sup>1</sup>, Daniela Ferlicca <sup>1</sup>, Alice Annoni <sup>1</sup>, Marta Villa <sup>1</sup>, Simone Piva <sup>3,4</sup>, Maria Grazia Strepparava <sup>2</sup>, Emanuele Rezoagli <sup>1,2</sup>, Alberto Lucchini <sup>1,2</sup>, Giacomo Bellani <sup>1,2</sup>, Giuseppe Foti <sup>1,2</sup> and the Monza Follow-Up Study Group <sup>†</sup>

<sup>1</sup> Department of Emergency and Intensive Care, ASST Monza, 20900 Monza, Italy

<sup>2</sup> School of Medicine and Surgery, University of Milano-Bicocca, 20900 Monza, Italy

<sup>3</sup> Department of Medical and Surgical Specialties, Radiological Sciences and Public Health, University of Brescia, Brescia, Italy

<sup>4</sup> Department of Anesthesia, Critical Care and Emergency, Spedali Civili University Hospital, Brescia, Italy

<sup>†</sup> **Monza Follow-Up Study Group Collaborators:** SSA, Francesca Bettini, Diego Boaretto, Alfio Bronco, Mariangela Calabria, Gianmarco Carenini, Mara Clementi, Stefano Gatti, Fabrizia Mauri, Melissa Racis, Simone Sosio, Alessandra Valentino, Veronica Vigo.

## **Supplementary Material**

|                                                                                                                                                                                                                                         |      |
|-----------------------------------------------------------------------------------------------------------------------------------------------------------------------------------------------------------------------------------------|------|
| <b>Supplementary Materials</b>                                                                                                                                                                                                          | pag. |
| <b>ICU memory tool</b>                                                                                                                                                                                                                  | 2    |
| <b>Figure S1.</b> Study Flow Chart.                                                                                                                                                                                                     | 3    |
| <b>Figure S2.</b> Distribution of enrolled patients according to the different consecutive pandemic waves.                                                                                                                              | 4    |
| <b>Table S1.</b> Distribution of enrolled patients according to the different consecutive pandemic waves..                                                                                                                              | 5    |
| <b>Table S2.</b> HADS-A, HADS-D, PCL-5, ISI, FSS, PCS and MCS scores and corresponding prevalence of anxiety, depression, PTSD, sleep disturbance, Fatigue and Reduced HRQoL among enrolled patients in each consecutive pandemic wave. | 6    |
| <b>Table S3.</b> Types of ICU memories for patients who retained ICU memories (n = 114).                                                                                                                                                | 8    |
| <b>Table S4.</b> Patients characteristic according to the presence of Anxiety at six months from discharge.                                                                                                                             | 9    |
| <b>Table S5.</b> Patients characteristic according to the presence of Depression at six months from discharge.                                                                                                                          | 10   |
| <b>Table S6.</b> Patients' characteristics according to the presence of Post Traumatic Stress Disorder (PTSD).                                                                                                                          | 11   |
| <b>Table S7.</b> Patients' characteristics according to the presence of Insomnia.                                                                                                                                                       | 12   |
| <b>Table S8.</b> Patients' characteristics according to the presence of Fatigue.                                                                                                                                                        | 13   |
| <b>Table S9.</b> Patients' characteristic according to the presence of below-threshold Physical Component Score (PCS) of Short Form Health Survey 36 (SF-36) at six months from discharge.                                              | 14   |
| <b>Table S10.</b> Patients' characteristics according to the presence of below-threshold Mental Component Score (MCS) of Short Form Health Survey 36 (SF-36) at six months from discharge.                                              | 15   |
| <b>Table S11.</b> Short Form Health Survey 36 (SF-36) results according to the presence of pre-ICU and ICU memories.                                                                                                                    | 16   |

**ICU Memory Tool.**

1. Do you remember being admitted to hospital?
  - ☐ Clearly
  - ☐ Hazily
  - ☐ Not at all
2. Can you remember the time in hospital before you were admitted to intensive care?
  - ☐ All of it
  - ☐ Some of it
  - ☐ Nothing
3. Do you remember being in intensive care?
  - ☐ Yes
  - ☐ No
- 4a. Do you remember all the stay clearly?
  - ☐ Yes
  - ☐ No
- 4b. What do you remember? (circle those things you remember)
  - ☐ Family ☐ Alarms ☐ Voices ☐ Lights ☐ Faces ☐ Suctioning ☐ Clock ☐ Darkness
  - ☐ Breathing tube ☐ Tube in your nose ☐ Ward round ☐ Being uncomfortable
  - ☐ Panic ☐ Pain ☐ Feeling confused ☐ Feeling down ☐ Feeling anxious/frightened
  - ☐ Hallucinations ☐ Nightmares ☐ Dreams ☐ Feeling that people were trying to hurt you
- 4c. If you had any feelings that someone was trying to hurt or harm you while you were in intensive care can you please describe these feelings below  
.....[free text]
- 4d. If you had nightmares or hallucinations while you were in intensive care could you please describe these:  
.....[free text]
5. Do you remember being transferred from intensive care to the general wards?
  - ☐ Clearly
  - ☐ Hazily
  - ☐ Not at all
6. Have you had any unexplained feelings of panic or apprehension?
  - ☐ Yes
  - ☐ No
- 6a. If yes: What were you doing when these feelings happened?  
.....[free text]
7. Have you had any intrusive memories from your time in hospital or of the event that lead up to your admission?
  - ☐ Yes
  - ☐ No
- 7a. If yes to 7: What were you doing when these intrusive memories happened?  
.....[free text]
- 7b. If yes to 7: What did these memories consist of (e.g. frightening nightmares)?
8. Have you talked about what happened to you in intensive care with:-
  - ☐ A member of your family
  - ☐ A nurse on the ward
  - ☐ A friend
  - ☐ A doctor on the ward
  - ☐ Your family doctor

**Figure S1.** Study Flow Chart.

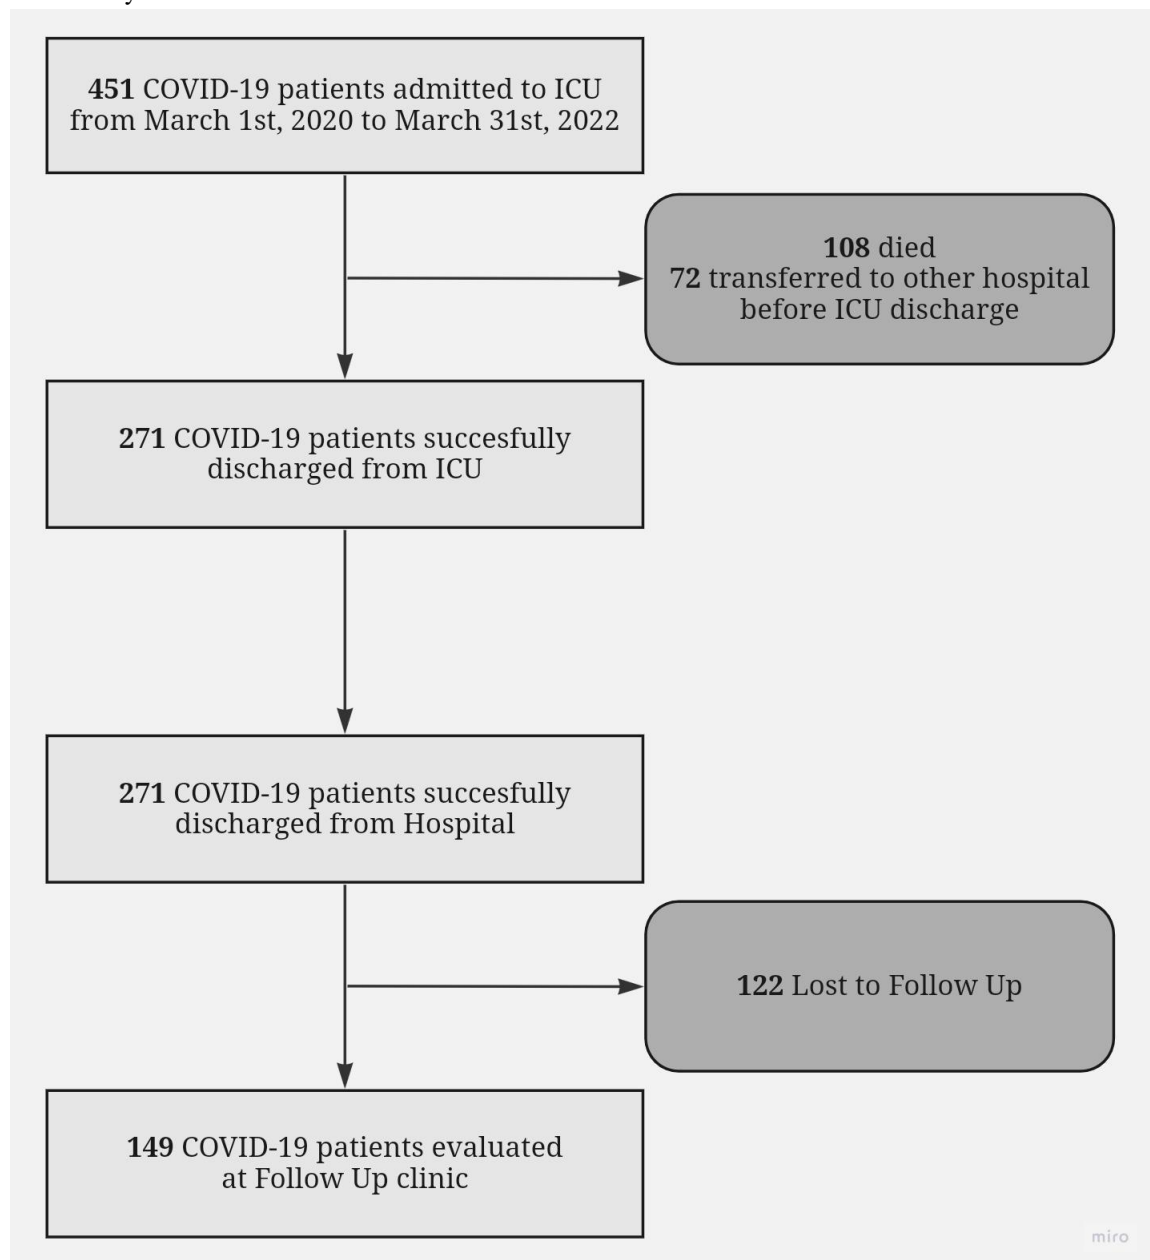

**Figure S2.** Distribution of enrolled patients according to the different consecutive pandemic waves: 1<sup>st</sup> pandemic wave (from March 2020 to September 2020), 2<sup>nd</sup> pandemic wave (from October 2020 to January 2021), 3<sup>rd</sup> pandemic wave (from February 2021 to September 2021), 4<sup>th</sup> pandemic wave (from October 2021 to March 2022).

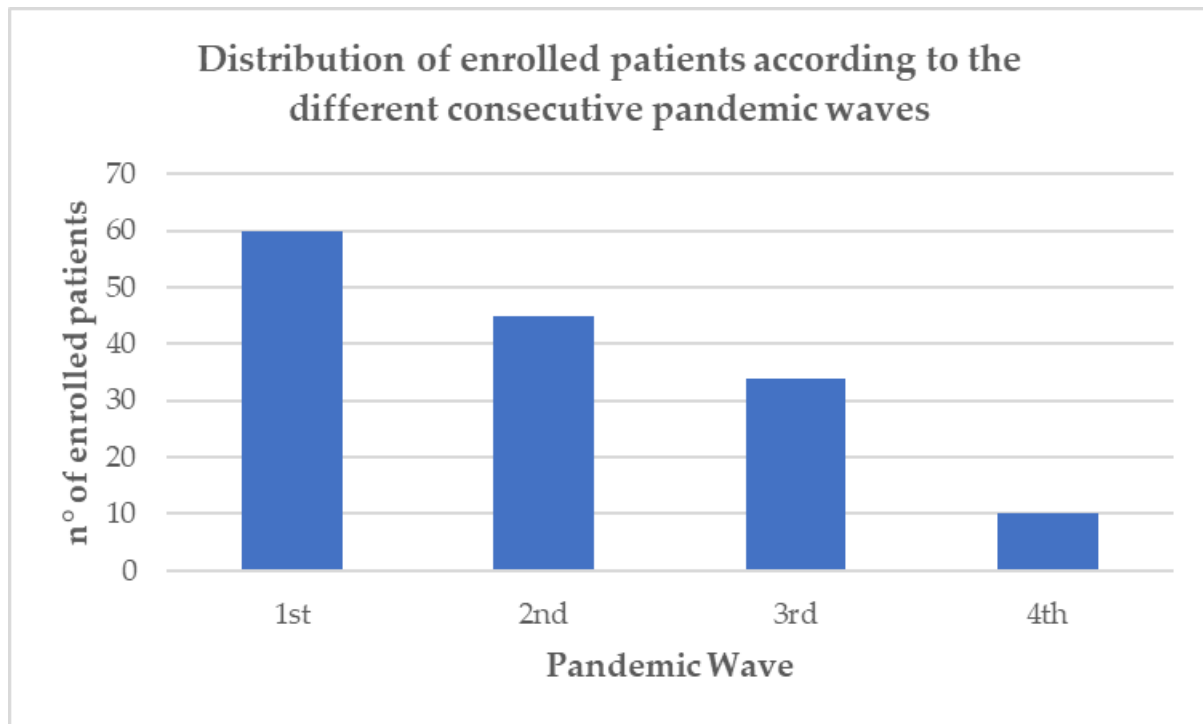

**Table S1.** Distribution of enrolled patients according to the different consecutive pandemic waves. 1<sup>st</sup> pandemic wave (from March 2020 to September 2020), 2<sup>nd</sup> pandemic wave (from October 2020 to January 2021), 3<sup>rd</sup> pandemic wave (from February 2021 to September 2021), 4<sup>th</sup> pandemic wave (from October 2021 to March 2022).

| Pandemic Wave   | Month   | N° of enrolled patients | TOT enrolled patients |
|-----------------|---------|-------------------------|-----------------------|
| 1 <sup>st</sup> | 03/2020 | 41                      | 60                    |
|                 | 04/2020 | 17                      |                       |
|                 | 05/2020 | 0                       |                       |
|                 | 06/2020 | 0                       |                       |
|                 | 07/2020 | 0                       |                       |
|                 | 08/2020 | 0                       |                       |
|                 | 09/2020 | 2                       |                       |
| 2 <sup>nd</sup> | 10/2020 | 12                      | 45                    |
|                 | 11/2020 | 23                      |                       |
|                 | 12/2020 | 4                       |                       |
|                 | 01/2021 | 6                       |                       |
| 3 <sup>rd</sup> | 02/2021 | 13                      | 34                    |
|                 | 03/2021 | 11                      |                       |
|                 | 04/2021 | 6                       |                       |
|                 | 05/2021 | 1                       |                       |
|                 | 06/2021 | 1                       |                       |
|                 | 07/2021 | 1                       |                       |
|                 | 08/2021 | 0                       |                       |
|                 | 09/2021 | 1                       |                       |
| 4 <sup>th</sup> | 10/2021 | 3                       | 10                    |
|                 | 11/2021 | 0                       |                       |
|                 | 12/2021 | 5                       |                       |
|                 | 01/2022 | 1                       |                       |
|                 | 02/2022 | 0                       |                       |

|            |         |     |            |
|------------|---------|-----|------------|
|            | 03/2022 | 1   |            |
| <b>TOT</b> |         | 149 | <b>149</b> |

**Table S2.** HADS-A, HADS-D, PCL-5, ISI, FSS, PCS and MCS scores and corresponding prevalence of anxiety, depression, PTSD, sleep disturbance, Fatigue and Reduced HRQoL among enrolled patients in each consecutive pandemic wave: 1<sup>st</sup> pandemic wave (from March 2020 to September 2020), 2<sup>nd</sup> pandemic wave (from October 2020 to January 2021), 3<sup>rd</sup> pandemic wave (from February 2021 to September 2021), 4<sup>th</sup> pandemic wave (from October 2021 to March 2022). p-value (two-tailed) examines the association between specific scores or conditions (dependent variables) with different pandemic waves (independent variable) by univariate logistic (for categorical variables) or linear (for continuous variables) regression models.

|                                       | <b>1<sup>st</sup> wave<br/>(n = 60)</b> | <b>2<sup>nd</sup> wave<br/>(n = 45)</b> | <b>3<sup>rd</sup> wave<br/>(n = 34)</b> | <b>4<sup>th</sup> wave<br/>(n = 10)</b> | <b>p</b>     |
|---------------------------------------|-----------------------------------------|-----------------------------------------|-----------------------------------------|-----------------------------------------|--------------|
| <b>Anxiety</b>                        |                                         |                                         |                                         |                                         |              |
| <b>HADS-A, median (IQR)</b>           | 3 (1 - 6)                               | 4 (1 - 8)                               | 3 (1 - 7)                               | 2 (2 - 5)                               | 0.421        |
| <b>HADS-A &gt; 8, N° (%)</b>          | 8 (13)                                  | 14 (31)                                 | 8 (24)                                  | 0 (0)                                   | <b>0.022</b> |
| <b>Depression</b>                     |                                         |                                         |                                         |                                         |              |
| <b>HADS D, median (IQR)</b>           | 3 (1 - 7)                               | 3 (1 - 7)                               | 4 (1 - 8)                               | 3 (2 - 5)                               | 0.692        |
| <b>HADS-D &gt; 8, N° (%)</b>          | 13 (22)                                 | 10 (22)                                 | 9 (26)                                  | 1 (10)                                  | 0.710        |
| <b>Post-traumatic Stress Disorder</b> |                                         |                                         |                                         |                                         |              |
| <b>PCL-5, median (IQR)</b>            | 5 (1 - 10)                              | 8 (1 - 16)                              | 10 (2 - 17)                             | 2 (1 - 6)                               | 0.070        |
| <b>PCL &gt; 32, N° (%)</b>            | 3 (5)                                   | 3 (7)                                   | 5 (15)                                  | 0 (0)                                   | 0.233        |
| <b>Sleep Disorder</b>                 |                                         |                                         |                                         |                                         |              |
| <b>ISI, median (IQR)</b>              | 3 (2 - 6)                               | 2 (1 - 9)                               | 3 (1 - 5)                               | 2 (1 - 3)                               | 0.468        |
| <b>ISI &gt; 8, N° (%)</b>             | 9 (15)                                  | 13 (29)                                 | 6 (18)                                  | 0 (0)                                   | 0.058        |
| <b>Fatigue</b>                        |                                         |                                         |                                         |                                         |              |
| <b>FSS, median (IQR)</b>              | 23 (14 - 41)                            | 26 (16 - 47)                            | 28 (17 - 38)                            | 13 (11 - 24)                            | 0.235        |
| <b>FSS &gt; 36, N° (%)</b>            | 20 (33)                                 | 17 (38)                                 | 12 (35)                                 | 2 (20)                                  | 0.732        |
| <b>Health-Related Quality of Life</b> |                                         |                                         |                                         |                                         |              |
| <b>MCS, median (IQR)</b>              | 44 (30 - 50)                            | 36 (20 - 47)                            | 35 (19 - 48)                            | 41 (29 - 47)                            | 0.216        |
| <b>MCS &lt; 50, N° (%)</b>            | 46 (77)                                 | 38 (84)                                 | 27 (79)                                 | 10 (100)                                | 0.150        |
| <b>PCS, median (IQR)</b>              | 51 (38 - 57)                            | 47 (35 - 56)                            | 42 (33 - 57)                            | 57 (53 - 58)                            | <b>0.039</b> |
| <b>PCS &lt; 50, N° (%)</b>            | 27 (45)                                 | 25 (56)                                 | 22 (65)                                 | 2 (20)                                  | <b>0.047</b> |
| <b>Hospital Memories recall</b>       |                                         |                                         |                                         |                                         |              |
| <b>In-ICU Memories, N° (%)</b>        | 45 (75)                                 | 38 (84)                                 | 23 (67)                                 | 8 (80)                                  | 0.354        |



|                                    |         |         |         |          |              |
|------------------------------------|---------|---------|---------|----------|--------------|
| <b>Pre-ICU Memories, N° (%)</b>    | 36 (60) | 29 (64) | 19 (56) | 5 (50)   | 0.797        |
| <b>Delusional Memories, N° (%)</b> | 50 (83) | 30 (67) | 20 (59) | 4 (40)   | <b>0.009</b> |
| <b>Factual Memories, , N° (%)</b>  | 50 (83) | 39 (87) | 31 (91) | 10 (100) | 0.258        |
| <b>Feeling Memories, , N° (%)</b>  | 32 (53) | 28 (62) | 24 (70) | 2 (20)   | <b>0.026</b> |

FSS: fatigue Severity Scale; HADS-A: Hospital Anxiety and Depression Scale-Anxiety; HADS-D: Hospital Anxiety and Depression Scale-Depression; ISI: Insomnia Severity Index; MCS: Mental Component Summary Measures of quality of life; PCL-5: PTSD Checklist for DSM-5; PCS: Physical Component Summary Measures of quality of life.

**Table S3.** Types of ICU memories for patients who retained ICU memories (n = 114).

|                                                | Patients with ICU<br>memories<br>(n = 114) |
|------------------------------------------------|--------------------------------------------|
| <b>Presence of Factual memories, N° (%)</b>    | <b>99 (87)</b>                             |
| RELATIVES, n° (% of factual memories)          | 37 (37)                                    |
| ALARMS                                         | 38 (38)                                    |
| VOICES                                         | 60 (61)                                    |
| LIGHTS                                         | 85 (86)                                    |
| FACES                                          | 38 (38)                                    |
| ENDOTRACHEAL TUBE                              | 58 (59)                                    |
| TRACHEAL ASPIRATIONS                           | 47 (47)                                    |
| DARKNESS                                       | 15 (15)                                    |
| CLOCK                                          | 26 (26)                                    |
| NASOGASTRIC TUBE                               | 40 (40)                                    |
| MEDICAL WARD                                   | 68 (69)                                    |
| <b>Presence of Feeling memories, N° (%)</b>    | <b>68 (60)</b>                             |
| DISCOMFORT n° (% of feeling memories)          | 33 (49)                                    |
| DIZZINESS                                      | 29 (43)                                    |
| DISCOURAGEMENT                                 | 22 (32)                                    |
| ANXIETY                                        | 50 (74)                                    |
| FEAR                                           | 19 (28)                                    |
| PAIN                                           | 26 (38)                                    |
| <b>Presence of delusional memories, N° (%)</b> | <b>79 (69)</b>                             |
| THREATENING n° (% of delusional<br>memories)   | 21 (27)<br>52 (66)                         |
| HALLUCINATIONS                                 | 46 (58)                                    |
| NIGHTMARES                                     | 69 (87)                                    |
| DREAMS                                         |                                            |

**Table S4.** Patients characteristic according to the presence of Anxiety at six months from discharge. Anxiety is defined as an Hospital Anxiety and Depression Scale - Anxiety (HADS-A) score > 8.

|                                                               | <b>Anxiety<br/>N° = 30 (20%)</b> | <b>No Anxiety<br/>N° = 119 (80%)</b> | <b>p</b>     |
|---------------------------------------------------------------|----------------------------------|--------------------------------------|--------------|
| <b>Age, years, median (IQR)</b>                               | 58 (49-65)                       | 61 (54-67)                           | 0.371        |
| <b>Sex, M, N°(%)</b>                                          | 18 (60)                          | 91 (77)                              | 0.057        |
| <b>BMI. kg/m2m, median (IQR)</b>                              | 29.9 (27.1-35.8)                 | 28.9 (26.6-32.4)                     | 0.110        |
| <b>Charlson Index, median (IQR)</b>                           | 0 (0-0)                          | 0 (0-0)                              | 0.751        |
| <b>N of comorbidities. N°(%)</b>                              |                                  |                                      | 0.937        |
| <b>0</b>                                                      | 9 (31)                           | 32 (27)                              |              |
| <b>1</b>                                                      | 8 (28)                           | 36 (31)                              |              |
| <b>2</b>                                                      | 4 (14)                           | 21 (18)                              |              |
| <b>3</b>                                                      | 3 (10)                           | 14 (12)                              |              |
| <b>4</b>                                                      | 5 (17)                           | 15 (13)                              |              |
| <b>SAPS II, median (IQR)</b>                                  | 40 (30-46)                       | 35 (29-43)                           | 0.192        |
| <b>General Ward pre-ICU Length of stay, days, median, IQR</b> | 3 (1-4)                          | 3 (1-5)                              | 0.875        |
| <b>ICU Length Of Stay, days, median (IQR)</b>                 | 18 (13-34)                       | 17 (11-26)                           | 0.329        |
| <b>Hospital Length of Stay, days, median (IQR)</b>            | 47 (32-60)                       | 40 (29-52)                           | 0.172        |
| <b>Duration of mechanical ventilation, days, median (IQR)</b> | 14 (9-26)                        | 13 (6-19)                            | 0.258        |
| <b>Tracheostomy, N°(%)</b>                                    | 5 (17)                           | 25 (21)                              | 0.623        |
| <b>ECMO, N°(%)</b>                                            | 4 (13)                           | 12 (10)                              | 0.618        |
| <b>Pronation, N°(%)</b>                                       | 25 (83)                          | 94 (80)                              | 0.651        |
| <b>Corticosteroids, N°(%)</b>                                 | 21 (72)                          | 80 (68)                              | 0.776        |
| <b>CRRT, N°(%)</b>                                            | 3 (10)                           | 2 (2)                                | <b>0.022</b> |
| <b>Catecholamine, N°(%)</b>                                   | 6 (21)                           | 18 (15)                              | 0.490        |

BMI: Body Mass Index; CRRT: Continuous Renal Replacement Therapy; ECMO: Extracorporeal Membrane Oxygenation; ICU: Intensive Care Unit; MV: Mechanical; SAPSII: Simplified Acute Physiological Score II.

**Table S5.** Patients characteristic according to the presence of depression at six months from discharge. Depression is defined as an Hospital Anxiety and Depression Scale - Depression (HADS-D) score > 8.

|                                                                       | <b>Depression<br/>N° = 33 (22.1%)</b> | <b>No Depression<br/>N° = 116 (77.9%)</b> | <b>p</b>     |
|-----------------------------------------------------------------------|---------------------------------------|-------------------------------------------|--------------|
| <b>Age, years, median (IQR)</b>                                       | 59 (53-68)                            | 61 (54-66)                                | 0.932        |
| <b>Sex, M, N°(%)</b>                                                  | 19 (58)                               | 90 (78.3)                                 | <b>0.017</b> |
| <b>BMI. kg/m2m, median (IQR)</b>                                      | 31.3 (28-36)                          | 28.7 (27-32)                              | 0.075        |
| <b>Charlson Index, median (IQR)</b>                                   | 0 (0-1)                               | 0 (0-0)                                   | 0.221        |
| <b>N of comorbidities. N°(%)</b>                                      |                                       |                                           | 0.833        |
| <b>0</b>                                                              | 8 (25)                                | 33 (29)                                   |              |
| <b>1</b>                                                              | 10 (31)                               | 34 (30)                                   |              |
| <b>2</b>                                                              | 4 (13)                                | 21 (18)                                   |              |
| <b>3</b>                                                              | 4 (13)                                | 13 (11)                                   |              |
| <b>4</b>                                                              | 6 (19)                                | 14 (12)                                   |              |
| <b>SAPS II, median (IQR)</b>                                          | 38 (32-45)                            | 35 (29-43)                                | 0.276        |
| <b>General Ward pre-ICU<br/>Length of stay, days,<br/>median, IQR</b> | 3 (1-5)                               | 3 (1-5)                                   | 0.6133       |
| <b>ICU Length Of Stay, days,<br/>median (IQR)</b>                     | 19 (11-37)                            | 17 (12-25)                                | 0.364        |
| <b>Hospital Length of Stay,<br/>days, median (IQR)</b>                | 45 (32-56)                            | 39 (29-50)                                | 0.141        |
| <b>Duration of mechanical<br/>ventilation, days, median<br/>(IQR)</b> | 13 (8-26)                             | 13 (6-19)                                 | 0.219        |
| <b>Tracheostomy, N°(%)</b>                                            | 6 (19)                                | 24 (21)                                   | 0.776        |
| <b>ECMO, N°(%)</b>                                                    | 6 (18)                                | 10 (9)                                    | 0.122        |
| <b>Pronation, N°(%)</b>                                               | 26 (79)                               | 93 (81)                                   | 0.791        |
| <b>Corticosteroids, N°(%)</b>                                         | 26 (81)                               | 75 (65)                                   | 0.184        |
| <b>CRRT, N°(%)</b>                                                    | 4 (13)                                | 1 (1)                                     | <b>0.001</b> |
| <b>Catecholamine, N°(%)</b>                                           | 7 (22)                                | 17 (15)                                   | 0.348        |

BMI: Body Mass Index; CRRT: Continuous Renal Replacement Therapy; ECMO: Extracorporeal Membrane Oxygenation; ICU: Intensive Care Unit; MV: Mechanical; SAPSII: Simplified Acute Physiological Score II.

**Table S6.** Patients' characteristics according to the presence of Post Traumatic Stress Disorder (PTSD). PTSD is defined as a PTSD Checklist for DSM-5 (PCL-5) score >32.

|                                                               | <b>PTSD</b><br>N° = 11 (7%) | <b>no PTSD</b><br>N° = 138 (93%) | <b>p</b> |
|---------------------------------------------------------------|-----------------------------|----------------------------------|----------|
| <b>Age, years, median (IQR)</b>                               | 57 (48-59)                  | 61 (54-67)                       | 0.073    |
| <b>Sex, M, N°(%)</b>                                          | 6 (55)                      | 103 (75)                         | 0.135    |
| <b>BMI. kg/m2m, median (IQR)</b>                              | 31.3 (23.9-39.1)            | 29.1 26.7 32.5                   | 0.537    |
| <b>Charlson Index, median (IQR)</b>                           | 0 (0-2)                     | 0 0 0                            | 0.668    |
| <b>N of comorbidities. N°(%)</b>                              |                             |                                  | 0.574    |
| 0                                                             | 5 (46)                      | 36 (27)                          |          |
| 1                                                             | 3 (27)                      | 41 (30)                          |          |
| 2                                                             | 2 (18)                      | 23 (17)                          |          |
| 3                                                             | 0 (0)                       | 17 (13)                          |          |
| 4                                                             | 1 (9)                       | 20 (14)                          |          |
| <b>SAPS II, median (IQR)</b>                                  | 34 (29-52)                  | 36 (29-43)                       | 0.606    |
| <b>General Ward pre-ICU Length of stay, days, median, IQR</b> | 4 (1-7)                     | 3 (1-5)                          | 0.342    |
| <b>ICU Length Of Stay, days, median (IQR)</b>                 | 13 (5-21)                   | 18 (12-28)                       | 0.263    |
| <b>Hospital Length of Stay, days, median (IQR)</b>            | 44 (13-48)                  | 41 (29-52)                       | 0.583    |
| <b>Duration of mechanical ventilation, days, median (IQR)</b> | 14 (5-21)                   | 13 (7-20)                        | 0.955    |
| <b>Tracheostomy. n(%)</b>                                     | 1 (9)                       | 29 (22)                          | 0.328    |
| <b>ECMO. n(%)</b>                                             | 2 (18)                      | 14 (10)                          | 0.413    |
| <b>Pronation. n(%)</b>                                        | 10 (91)                     | 109 (79)                         | 0.362    |
| <b>Corticosteroids. n(%)</b>                                  | 7 (64)                      | 93 (68)                          | 0.899    |
| <b>CVVH. n(%)</b>                                             | 1 (9)                       | 4 (3)                            | 0.283    |
| <b>catecholamine. n(%)</b>                                    | 2 (18)                      | 22 (16)                          | 0.871    |

BMI: Body Mass Index; CRRT: Continuous Renal Replacement Therapy; ECMO: Extracorporeal Membrane Oxygenation; ICU: Intensive Care Unit; MV: Mechanical; SAPSII: Simplified Acute Physiological Score II.

**Table S7.** Patients' characteristics according to the presence of Insomnia. Insomnia is defined as an Insomnia Severity Index (ISI) score >8.

|                                                               | <b>Insomnia<br/>N° = 28 (19%)</b> | <b>no Insomnia<br/>N° = 121 (81)</b> | <b>p</b>     |
|---------------------------------------------------------------|-----------------------------------|--------------------------------------|--------------|
| <b>Age, years, median (IQR)</b>                               | 57 (48-62)                        | 61 (55-67)                           | <b>0.031</b> |
| <b>Sex, M, N°(%)</b>                                          | 18 (67)                           | 91 (75)                              | 0.362        |
| <b>BMI. kg/m2m, median (IQR)</b>                              | 29.1 (26.9-33.1)                  | 29.1 (26.6-32.8)                     | 0.962        |
| <b>Charlson Index, median (IQR)</b>                           | 0 (0-0)                           | 0 (0-0)                              | 0.533        |
| <b>N of comorbidities. N°(%)</b>                              |                                   |                                      | 0.156        |
| <b>0</b>                                                      | 10 (37)                           | 31 (26)                              |              |
| <b>1</b>                                                      | 9 (33)                            | 35 (29)                              |              |
| <b>2</b>                                                      | 6 (22)                            | 19 (16)                              |              |
| <b>3</b>                                                      | 2 (7)                             | 15 (13)                              |              |
| <b>4</b>                                                      | 0 (0)                             | 20 (17)                              |              |
| <b>SAPS II, median (IQR)</b>                                  | 35 (29-47)                        | 36 (29-43)                           | 0.688        |
| <b>General Ward pre-ICU Length of stay, days, median, IQR</b> | 3 (1-6)                           | 3 (1-5)                              | 0.604        |
| <b>ICU Length Of Stay, days, median (IQR)</b>                 | 13 (8-23)                         | 18 (12-28)                           | 0.285        |
| <b>Hospital Length of Stay, days, median (IQR)</b>            | 37 (25-50)                        | 42 (30-52)                           | 0.360        |
| <b>Duration of mechanical ventilation, days, median (IQR)</b> | 12 (8-17)                         | 13 (6-21)                            | 0.979        |
| <b>Tracheostomy. n(%)</b>                                     | 2 (7)                             | 28 (23)                              | 0.061        |
| <b>ECMO. n(%)</b>                                             | 3 (11)                            | 13 (11)                              | 0.956        |
| <b>Pronation. n(%)</b>                                        | 24 (89)                           | 95 (79)                              | 0.219        |
| <b>Corticosteroids. n(%)</b>                                  | 19 (70)                           | 82 (68)                              | 0.837        |
| <b>CVVH. n(%)</b>                                             | 1 (4)                             | 4 (3)                                | 0.930        |
| <b>catecholamine. n(%)</b>                                    | 4 (15)                            | 20 (17)                              | 0.801        |

BMI: Body Mass Index; CRRT: Continuous Renal Replacement Therapy; ECMO: Extracorporeal Membrane Oxygenation; ICU: Intensive Care Unit; MV: Mechanical; SAPSII: Simplified Acute Physiological Score II.

**Table S8.** Patients' characteristics according to the presence of Fatigue. Fatigue is defined as a Fatigue Severity Scale (FSS) score >36.

|                                                               | <b>Fatigue</b><br>N° = 51 (34%) | <b>no Fatigue</b><br>N° = 98 (66%) | <b>p</b>     |
|---------------------------------------------------------------|---------------------------------|------------------------------------|--------------|
| <b>Age, years, median (IQR)</b>                               | 61 (57-69)                      | 59 (51-66)                         | <b>0.027</b> |
| <b>Sex, M, N°(%)</b>                                          | 39 (77)                         | 70 (72)                            | 0.572        |
| <b>BMI. kg/m2m, median (IQR)</b>                              | 29.4 (26.8-35.8)                | 29.0 (26.6-32)                     | 0.119        |
| <b>Charlson Index, median (IQR)</b>                           | 0 (0-1)                         | 0 (0-0)                            | 0.266        |
| <b>N of comorbidities. N°(%)</b>                              |                                 |                                    | 0.905        |
| <b>0</b>                                                      | 16 (32)                         | 25 (26)                            |              |
| <b>1</b>                                                      | 15 (30)                         | 29 (30)                            |              |
| <b>2</b>                                                      | 7 (14)                          | 18 (19)                            |              |
| <b>3</b>                                                      | 5 (10)                          | 12 (12)                            |              |
| <b>4</b>                                                      | 7 (14)                          | 13 (13)                            |              |
| <b>SAPS II, median (IQR)</b>                                  | 38 (30-43)                      | 35 (28-43)                         | 0.355        |
| <b>General Ward pre-ICU Length of stay, days, median, IQR</b> | 3 (1-5)                         | 3 (1-5)                            | 0.903        |
| <b>ICU Length Of Stay, days, median (IQR)</b>                 | 20 (12-36)                      | 16 (10-25)                         | 0.084        |
| <b>Hospital Length of Stay, days, median (IQR)</b>            | 46 (32-60)                      | 39 (29-49)                         | <b>0.036</b> |
| <b>Duration of mechanical ventilation, days, median (IQR)</b> | 12 (7-20)                       | 13 (6-20)                          | 0.971        |
| <b>Tracheostomy. n(%)</b>                                     | 15 (30)                         | 15 (16)                            | <b>0.041</b> |
| <b>ECMO. n(%)</b>                                             | 8 (16)                          | 8 (8)                              | 0.166        |
| <b>Pronation. n(%)</b>                                        | 45 (88)                         | 74 (76)                            | 0.082        |
| <b>Corticosteroids. n(%)</b>                                  | 40 (80)                         | 61 (63)                            | 0.074        |
| <b>CVVH. n(%)</b>                                             | 3 (6)                           | 2 (2)                              | 0.217        |
| <b>catecholamine. n(%)</b>                                    | 10 (20)                         | 14 (15)                            | 0.402        |

BMI: Body Mass Index; CRRT: Continuous Renal Replacement Therapy; ECMO: Extracorporeal Membrane Oxygenation; ICU: Intensive Care Unit; MV: Mechanical; SAPSII: Simplified Acute Physiological Score II.

**Table S9.** Patients characteristic according to the presence of below-threshold Physical Component Score (PCS) of Short Form Health Survey 36 (SF-36) at six months from discharge. Low PCS is defined as < 50.

|                                                               | <b>Low PCS</b><br><b>N° = 76 (51%)</b> | <b>Normal PCS</b><br><b>N° = 73 (49%)</b> | <b>p</b>     |
|---------------------------------------------------------------|----------------------------------------|-------------------------------------------|--------------|
| <b>Age, years, median (IQR)</b>                               | 61 (56-68)                             | 57 (50-65)                                | <b>0.008</b> |
| <b>Sex, M, N°(%)</b>                                          | 54 (71)                                | 55 (76)                                   | 0.461        |
| <b>BMI. kg/m2m, median (IQR)</b>                              | 29.9 (26.9-33.8)                       | 28.5 (26.5-31.6)                          | <b>0.042</b> |
| <b>Charlson Index, median (IQR)</b>                           | 0 (0-1)                                | 0 (0-0)                                   | 0.144        |
| <b>N of comorbidities. N°(%)</b>                              |                                        |                                           | 0.463        |
| <b>0</b>                                                      | 20 (27)                                | 21 (29)                                   |              |
| <b>1</b>                                                      | 25 (33)                                | 19 (26)                                   |              |
| <b>2</b>                                                      | 9 (12)                                 | 16 (22)                                   |              |
| <b>3</b>                                                      | 9 (12)                                 | 8 (11)                                    |              |
| <b>4</b>                                                      | 12 (16)                                | 8 (11)                                    |              |
| <b>SAPS II, median (IQR)</b>                                  | 37 (30-43)                             | 34 (27-43)                                | 0.410        |
| <b>General Ward pre-ICU Length of stay, days, median, IQR</b> | 2 (0-5)                                | 3 (1-5)                                   | 0.5230       |
| <b>ICU Length Of Stay, days, median (IQR)</b>                 | 18 (12-34)                             | 17 (12-24)                                | 0.183        |
| <b>Hospital Length of Stay, days, median (IQR)</b>            | 45 (32-59)                             | 38 (29-46)                                | <b>0.017</b> |
| <b>Duration of mechanical ventilation, days, median (IQR)</b> | 12 (8-21)                              | 13 (6-19)                                 | 0.374        |
| <b>Tracheostomy, n(%)</b>                                     | 18 (24)                                | 12 (17)                                   | 0.252        |
| <b>ECMO, n(%)</b>                                             | 11 (15)                                | 5 (7)                                     | 0.140        |
| <b>Pronation, n(%)</b>                                        | 66 (87)                                | 53 (74)                                   | <b>0.043</b> |
| <b>Corticosteroids, n(%)</b>                                  | 58 (77)                                | 43 (60)                                   | <b>0.021</b> |
| <b>CVVH, n(%)</b>                                             | 4 (5)                                  | 1 (1)                                     | 0.270        |
| <b>catecholamine, n(%)</b>                                    | 11 (15)                                |                                           | 0.603        |

BMI: Body Mass Index; CRRT: Continuous Renal Replacement Therapy; ECMO: Extracorporeal Membrane Oxygenation; ICU: Intensive Care Unit; MV: Mechanical; SAPSII: Simplified Acute Physiological Score II.



**Table S10.** Patients characteristic according to the presence of below-threshold Mental Component Score (MCS) of Short Form Health Survey 36 (SF-36) at six months from discharge. Low MCS is defined as < 50.

|                                                               | <b>Low MCS<br/>N° = 121 (81.2)</b> | <b>Normal MCS<br/>N° = 28 (18.8)</b> | <b>p</b>     |
|---------------------------------------------------------------|------------------------------------|--------------------------------------|--------------|
| <b>Age, years, median (IQR)</b>                               | 60 (52-67)                         | 58 (55-65)                           | 0.447        |
| <b>Sex, M, N°(%)</b>                                          | 90 (75)                            | 19 (68)                              | 0.440        |
| <b>BMI. kg/m2m, median (IQR)</b>                              | 29,1 (26,8-33,2)                   | 28,1 (25.3-31.7)                     | 0.199        |
| <b>Charlson Index, median (IQR)</b>                           | 0 (0-0)                            | 0 (0-0)                              | 0.528        |
| <b>N of comorbidities. N°(%)</b>                              |                                    |                                      | 0.411        |
| <b>0</b>                                                      | 36 (30)                            | 5 (18)                               |              |
| <b>1</b>                                                      | 36 (30)                            | 8 (29)                               |              |
| <b>2</b>                                                      | 18 (15)                            | 7 (25)                               |              |
| <b>3</b>                                                      | 12 (10)                            | 5 (18)                               |              |
| <b>4</b>                                                      | 17 (14)                            | 3 (11)                               |              |
| <b>SAPS II, median (IQR)</b>                                  | 35 (29-43)                         | 38 (27-43)                           | 0.465        |
| <b>General Ward pre-ICU Length of stay, days, median, IQR</b> | 3 (1-5)                            | 3 (0-5)                              | 0.513        |
| <b>ICU Length Of Stay, days, median (IQR)</b>                 | 17 (11-28)                         | 18 (12-25)                           | 0.778        |
| <b>Hospital Length of Stay, days, median (IQR)</b>            | 40 (29-52)                         | 45 (36-57)                           | 0.485        |
| <b>Duration of mechanical ventilation, days, median (IQR)</b> | 12 (6-21)                          | 15 (9-19)                            | 0.290        |
| <b>Tracheostomy, n(%)</b>                                     | 26 (22)                            | 4 (15)                               | 0.414        |
| <b>ECMO, n(%)</b>                                             | 10 (8)                             | 6 (21)                               | <b>0.044</b> |
| <b>Pronation, n(%)</b>                                        | 100 (83)                           | 19 (68)                              | 0.063        |
| <b>Corticosteroids, n(%)</b>                                  | 80 (67)                            | 21 (75)                              | 0.425        |
| <b>CVVH, n(%)</b>                                             | 5 (4)                              | 0 (0)                                | 0.278        |
| <b>catecholamine, n(%)</b>                                    | 21 (18)                            | 3 (11)                               | 0.408        |

BMI: Body Mass Index; CRRT: Continuous Renal Replacement Therapy; ECMO: Extracorporeal Membrane Oxygenation; ICU: Intensive Care Unit; MV: Mechanical; SAPSII: Simplified Acute Physiological Score II.

**Table S11.** Short Form Health Survey 36 (SF-36) results according to the presence of pre-ICU and ICU memories.

|                                                           | All patients<br>(N° =149 ) | Pre-ICU<br>memories<br>(N° = 89) | No pre-ICU<br>memories<br>(N° =60) | p                | in-ICU<br>memories<br>(N° = 114) | No in-<br>ICU<br>memories<br>(N° = 35) | p            |
|-----------------------------------------------------------|----------------------------|----------------------------------|------------------------------------|------------------|----------------------------------|----------------------------------------|--------------|
| 36-Item Short Form Health Survey 36 (SF-36)               |                            |                                  |                                    |                  |                                  |                                        |              |
| <b>SF-36 Physical Functioning.</b><br>median.<br>IQR      | 80<br>55 - 95              | 85<br>65 - 95                    | 67.5<br>37.5 - 90                  | <b>0.001</b>     | 85<br>55 - 95                    | 65<br>35 - 90                          | <b>0.025</b> |
| <b>SF-36 Role Function - Physical.</b><br>median.<br>IQR  | 50<br>0 - 100              | 100<br>25 - 100                  | 37.5<br>0 - 100                    | <b>0.004</b>     | 75<br>25 - 100                   | 25<br>0 - 100                          | <b>0.011</b> |
| <b>SF-36 Role Function - Emotional.</b><br>median.<br>IQR | 100<br>33.3 - 100          | 100<br>66.7 - 100                | 33.3<br>0 - 100                    | <b>&lt;0.001</b> | 100<br>33.3 - 100                | 66.7<br>0 - 100                        | 0.221        |
| <b>SF-36 Vitality.</b><br>median.<br>IQR                  | 60<br>50 - 75              | 65<br>60 - 80                    | 55<br>40 - 65                      | <b>&lt;0.001</b> | 65<br>50 - 80                    | 55<br>45 - 65                          | <b>0.033</b> |
| <b>SF-36 Social Functioning.</b><br>median.<br>IQR        | 75<br>62.5 - 90            | 87.5<br>67.5 - 100               | 63.75<br>50 - 87.5                 | <b>&lt;0.001</b> | 75<br>62.5 - 100                 | 75<br>50 - 87.5                        | <b>0.027</b> |
| <b>SF-36 Emotional Well Being.</b><br>median.<br>IQR      | 72<br>60 - 88              | 76<br>68 - 88                    | 68<br>52 - 80                      | <b>0.001</b>     | 74<br>60 - 88                    | 72<br>60 - 84                          | 0.488        |
| <b>SF-36 Pain</b><br>median<br>IQR                        | 77.5<br>55 - 100           | 90<br>67.5 - 100                 | 67.5<br>45 - 90                    | <b>0.000</b>     | 80<br>57.5 - 100                 | 67.5<br>45 - 100                       | <b>0.017</b> |
| <b>0SF-36 General Health.</b><br>median.<br>IQR           | 65<br>45 - 80              | 70<br>55 - 80                    | 55<br>40 - 75                      | <b>0.004</b>     | 65<br>50 - 80                    | 60<br>35 - 75                          | 0.095        |

ICU: Intensive Care Unit.

**Table S12.** Multivariable analysis.

| <b>Anxiety (HADS-A &gt; 7)</b>    | <b>OR</b> | <b>CI 95%</b>  | <b>p</b>          |
|-----------------------------------|-----------|----------------|-------------------|
| Presence of Pre-ICU memories      | 0.253     | 0.108 - 0.592  | <b>0.002</b>      |
| <b>Depression (HADS-D &gt; 7)</b> | <b>OR</b> | <b>CI 95%</b>  | <b>p</b>          |
| Presence of Pre-ICU memories      | 0.148     | 0.053 - 0.417  | <b>&lt; 0.001</b> |
| CRRT                              | 26.203    | 2.268 - 302.7  | <b>0.009</b>      |
| Gender (male)                     | 0.245     | 0.089 - 0.676  | <b>0.007</b>      |
| Prone position                    | 0.228     | 0.067 - 0.773  | <b>0.018</b>      |
| BMI                               | 1.101     | 1.008 - 1.202  | <b>0.032</b>      |
| Pre ICU days                      | 1.158     | 1.009 - 1.329  | <b>0.036</b>      |
| <b>PTSD (PCL-5 &gt; 32)</b>       | <b>OR</b> | <b>CI 95%</b>  | <b>p</b>          |
| Gender (male)                     | 0.233     | 0.058 - 0.939  | <b>0.040</b>      |
| Pre ICU days                      | 1.159     | 1.003 - 1.338  | <b>0.045</b>      |
| Feeling memories                  | 8.524     | 1.035 - 70.215 | <b>0.046</b>      |
| <b>Insomnia (ISI &gt; 8)</b>      | <b>OR</b> | <b>CI 95%</b>  | <b>p</b>          |
| -                                 | -         | -              | -                 |
| <b>Fatigue (FSS &gt; 36)</b>      | <b>OR</b> | <b>CI 95%</b>  | <b>p</b>          |
| Presence of Pre-ICU memories      | 0.469     | 0.219 - 1.001  | <b>0.050</b>      |
| Corticosteroids                   | 2.814     | 1.180 - 6.709  | <b>0.020</b>      |
| BMI                               | 1.113     | 1.028 - 1.205  | <b>0.008</b>      |
| age                               | 1.057     | 1.013 - 1.104  | <b>0.010</b>      |
| <b>Low PCS (PCS &lt; 50)</b>      | <b>OR</b> | <b>CI 95%</b>  | <b>p</b>          |
| BMI                               | 1.126     | 1.035 - 1.225  | <b>0.006</b>      |
| Hospital length of stay           | 1.036     | 1.014 - 1.059  | <b>0.001</b>      |
| Age                               | 1.056     | 1.013 - 1.100  | <b>0.010</b>      |
| Steroids                          | 4.737     | 1.914 - 11.722 | <b>0.001</b>      |
| Catecholamines                    | 0.244     | 0.068 - 0.880  | <b>0.031</b>      |
| Presence of post ICU memories     | 0.391     | 0.174 - 0.879  | <b>0.023</b>      |
| <b>Low MCS (MCS &lt; 50)</b>      | <b>OR</b> | <b>CI 95%</b>  | <b>p</b>          |
| ECMO                              | 0.146     | 0.347 - 0.611  | <b>0.008</b>      |
| Pre ICU days                      | 1.207     | 1.018 - 1.431  | <b>0.030</b>      |

|                          |       |               |              |
|--------------------------|-------|---------------|--------------|
| Presence of ICU memories | 0.136 | 0.024 - 0.767 | <b>0.024</b> |
| ICU LOS                  | 1.087 | 1.014 - 1.165 | <b>0.019</b> |
| Hospital LOS             | 0.948 | 0.906 - 0.992 | <b>0.020</b> |

BMI: Body Mass Index; CRRT: Continuous Renal Replacement Therapy; ECMO: Extracorporeal Membrane Oxygenation; FSS: fatigue Severity Scale; HADS-A: Hospital Anxiety and Depression Scale-Anxiety; HADS-D: Hospital Anxiety and Depression Scale-Depression; ICU: Intensive Care Unit; ISI: Insomnia Severity Index; LOS: Length of Stay; MCS: Mental Component Summary Measures of quality of life; PCL-5: PTSD Checklist for DSM-5; PCS: Physical Component Summary Measures of quality of life
